# Supplementary figures and images for: Electric field triggered release of gas from a quasi-one-dimensional hydrate in the carbon nanotube
Source: Royal Society of Chemistry journal article supplement (doi:10.1039/d0nr01113d), 2020-01-01

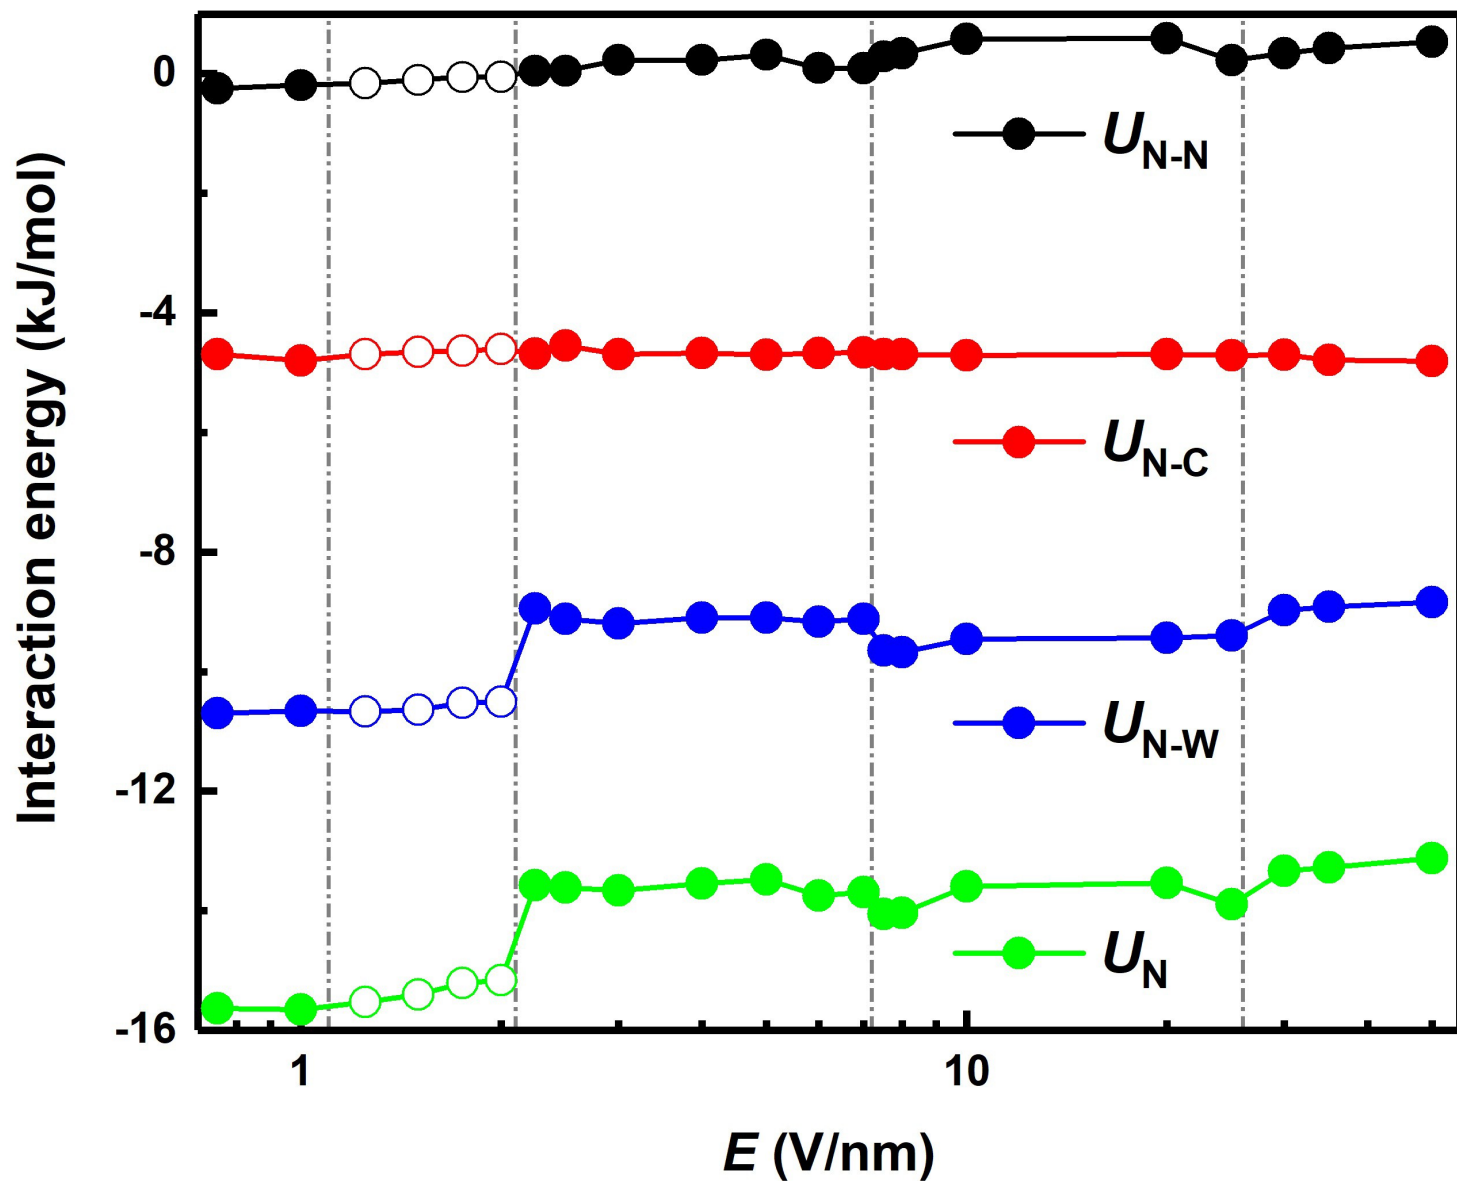

Supplement: d0nr01113d10.pdf [file d0nr01113d10.pdf]

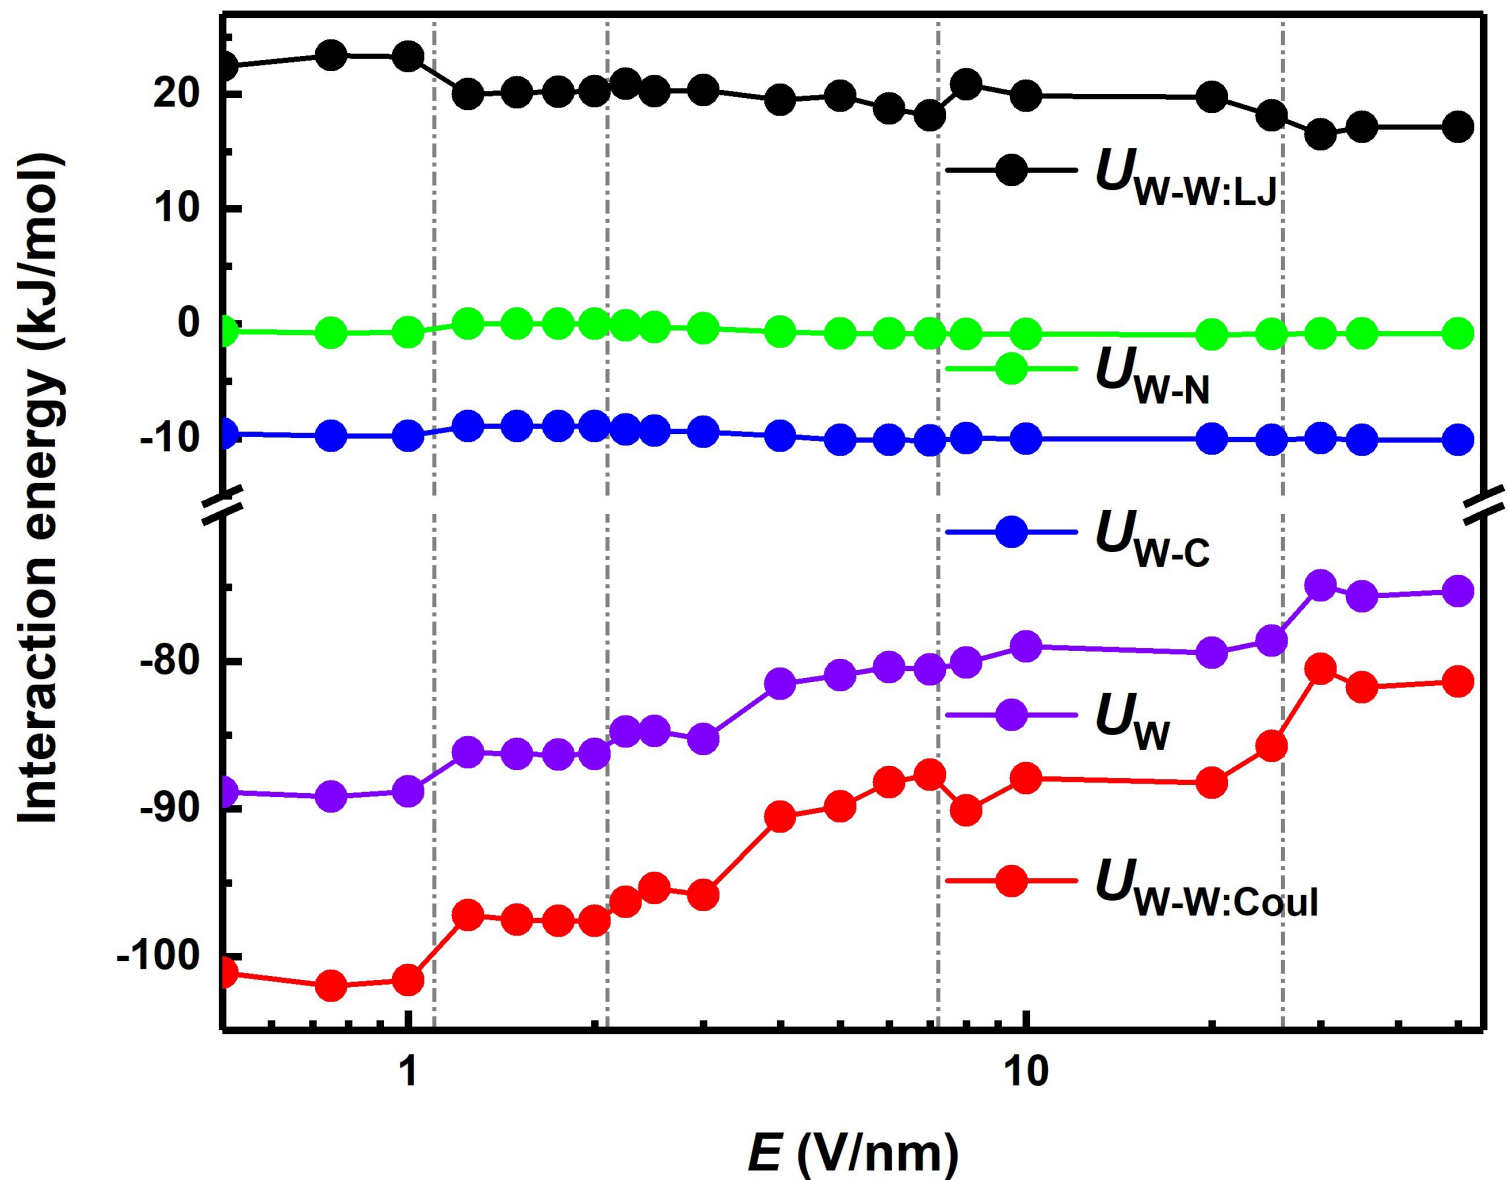

Supplement: d0nr01113d11.pdf [file d0nr01113d11.pdf]

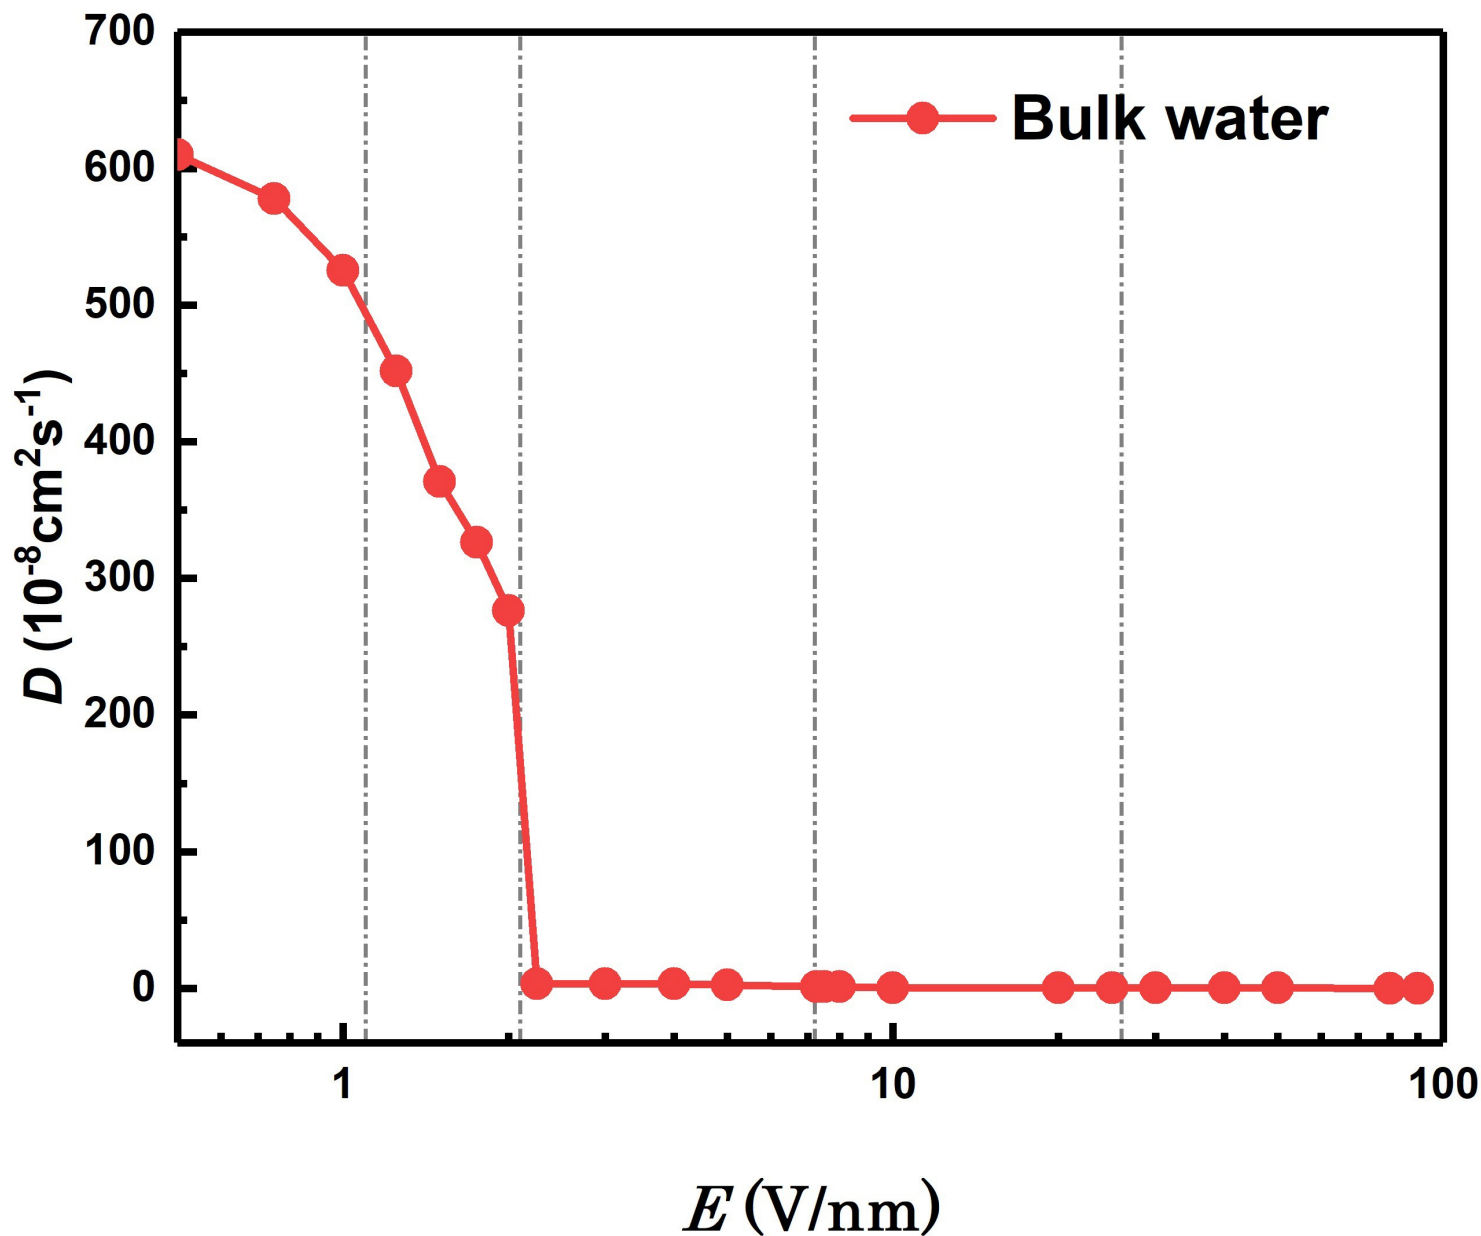

Supplement: d0nr01113d2.pdf [file d0nr01113d2.pdf]

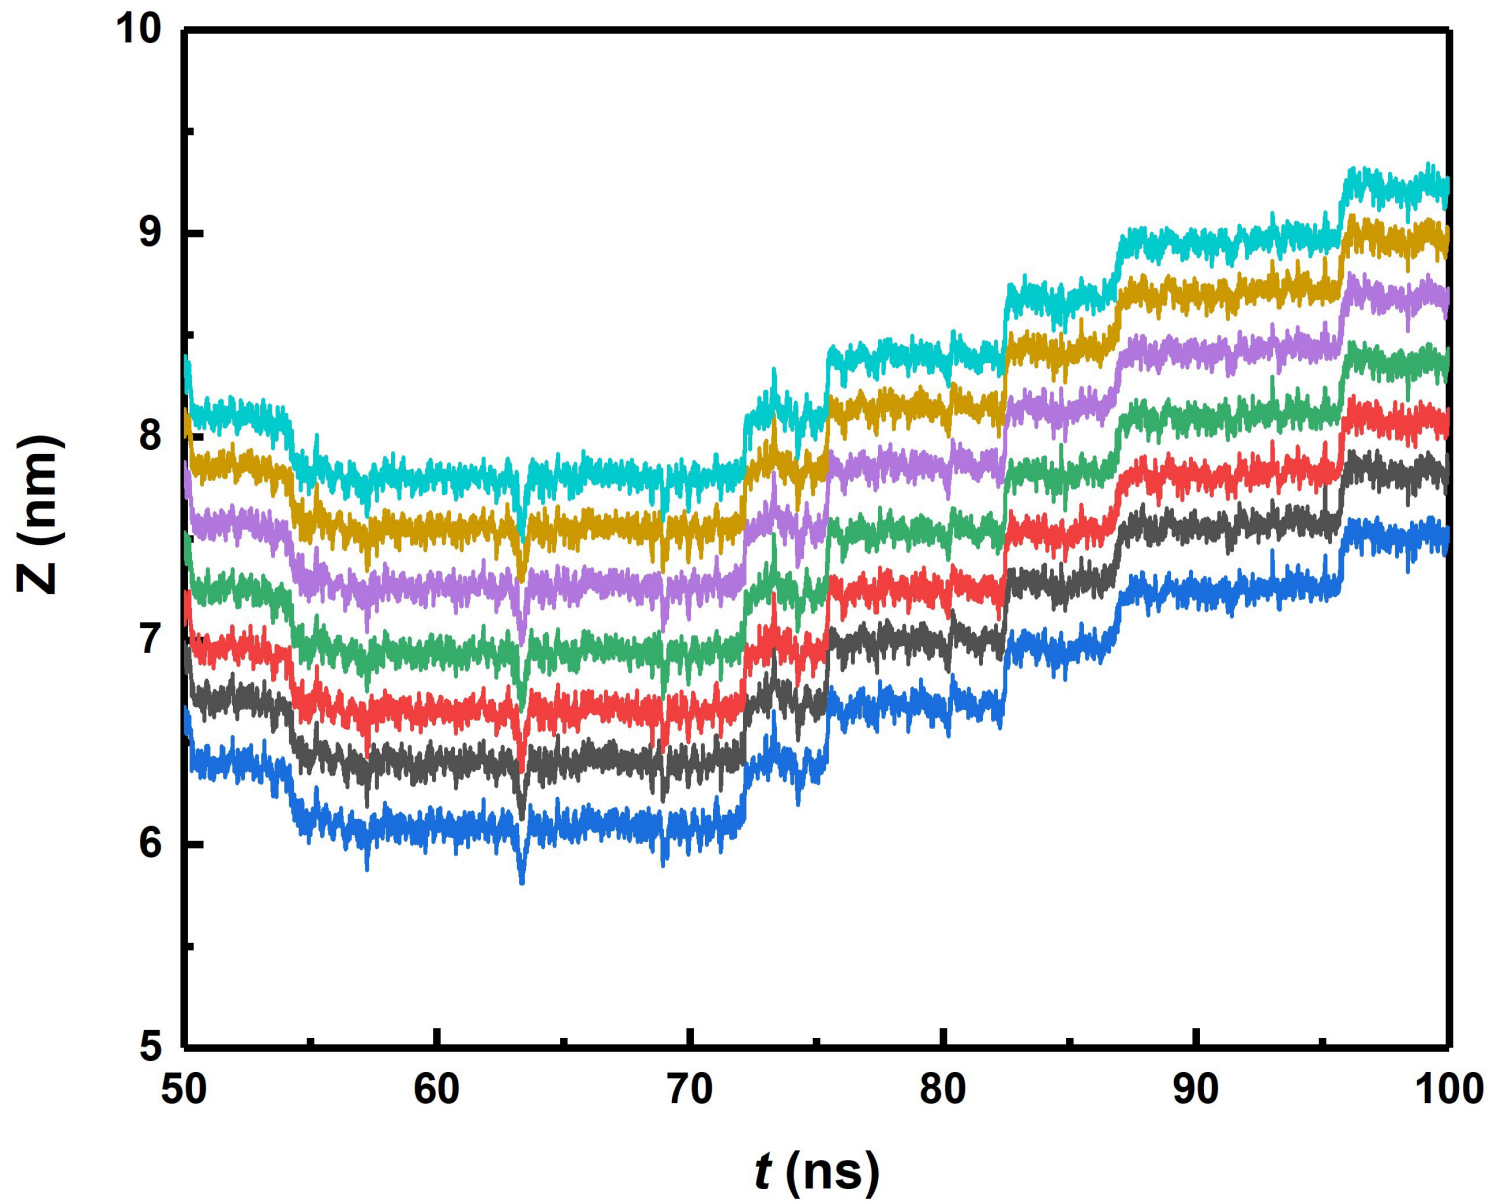

Supplement: d0nr01113d3.pdf [file d0nr01113d3.pdf]

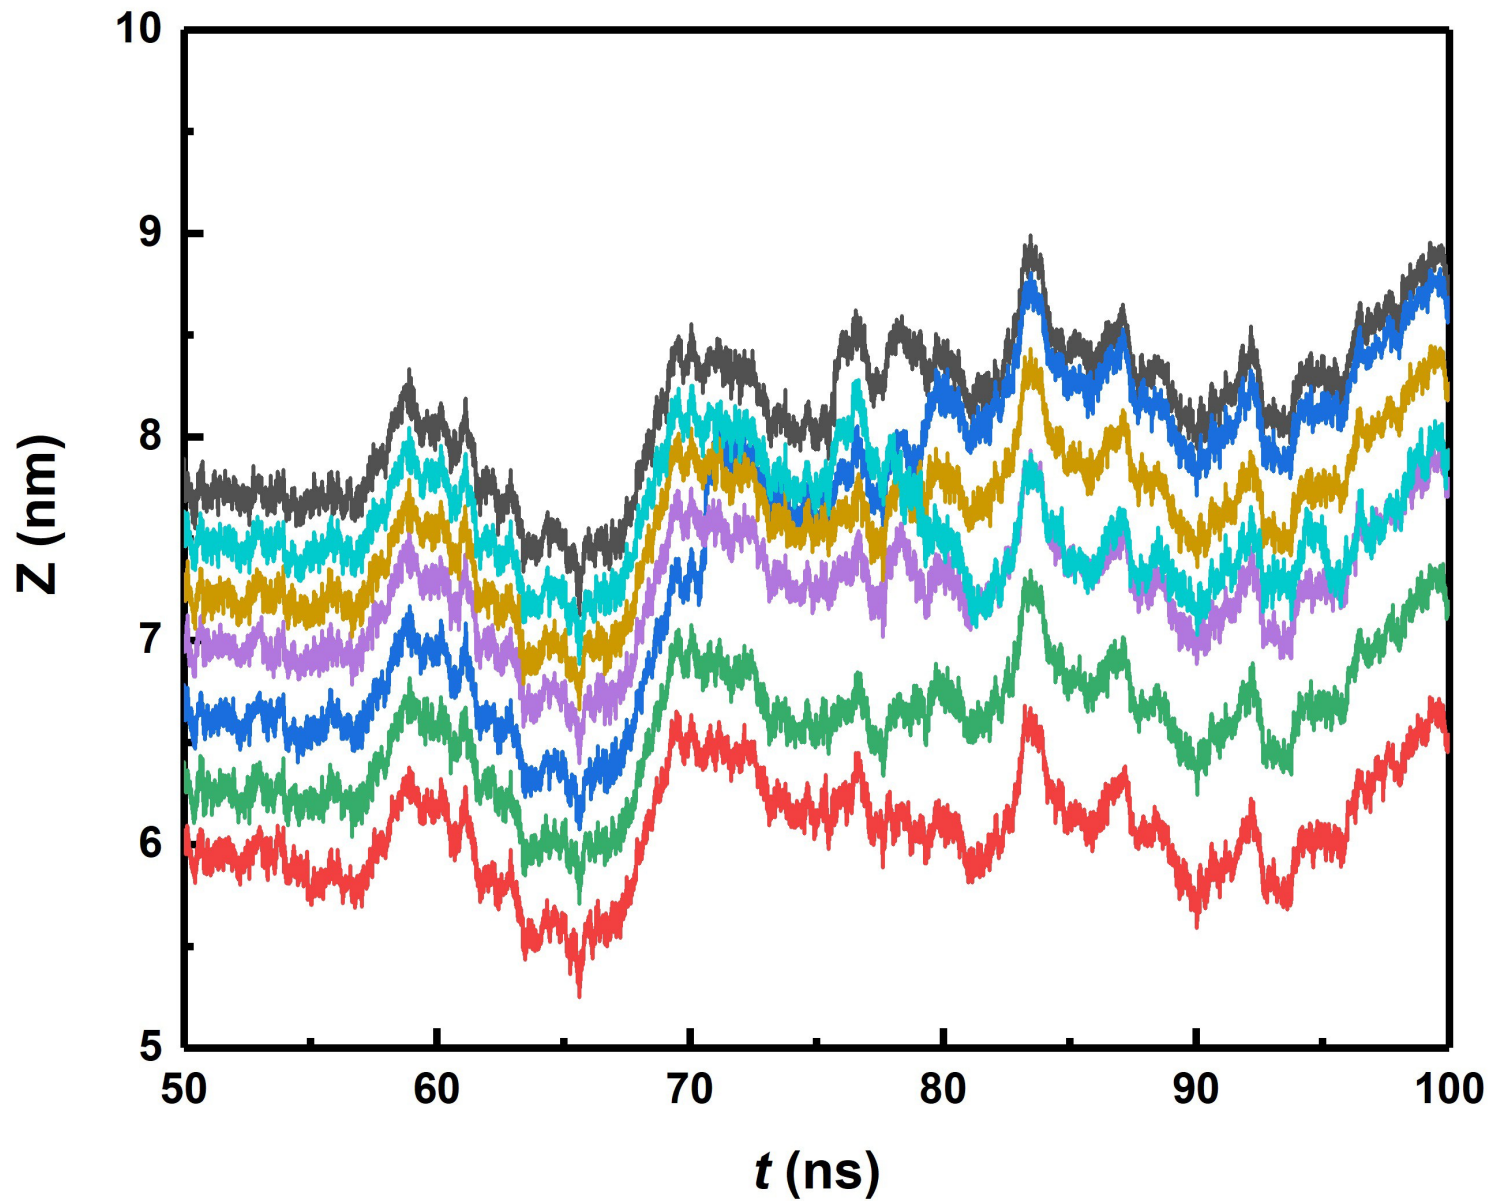

Supplement: d0nr01113d5.pdf [file d0nr01113d5.pdf]

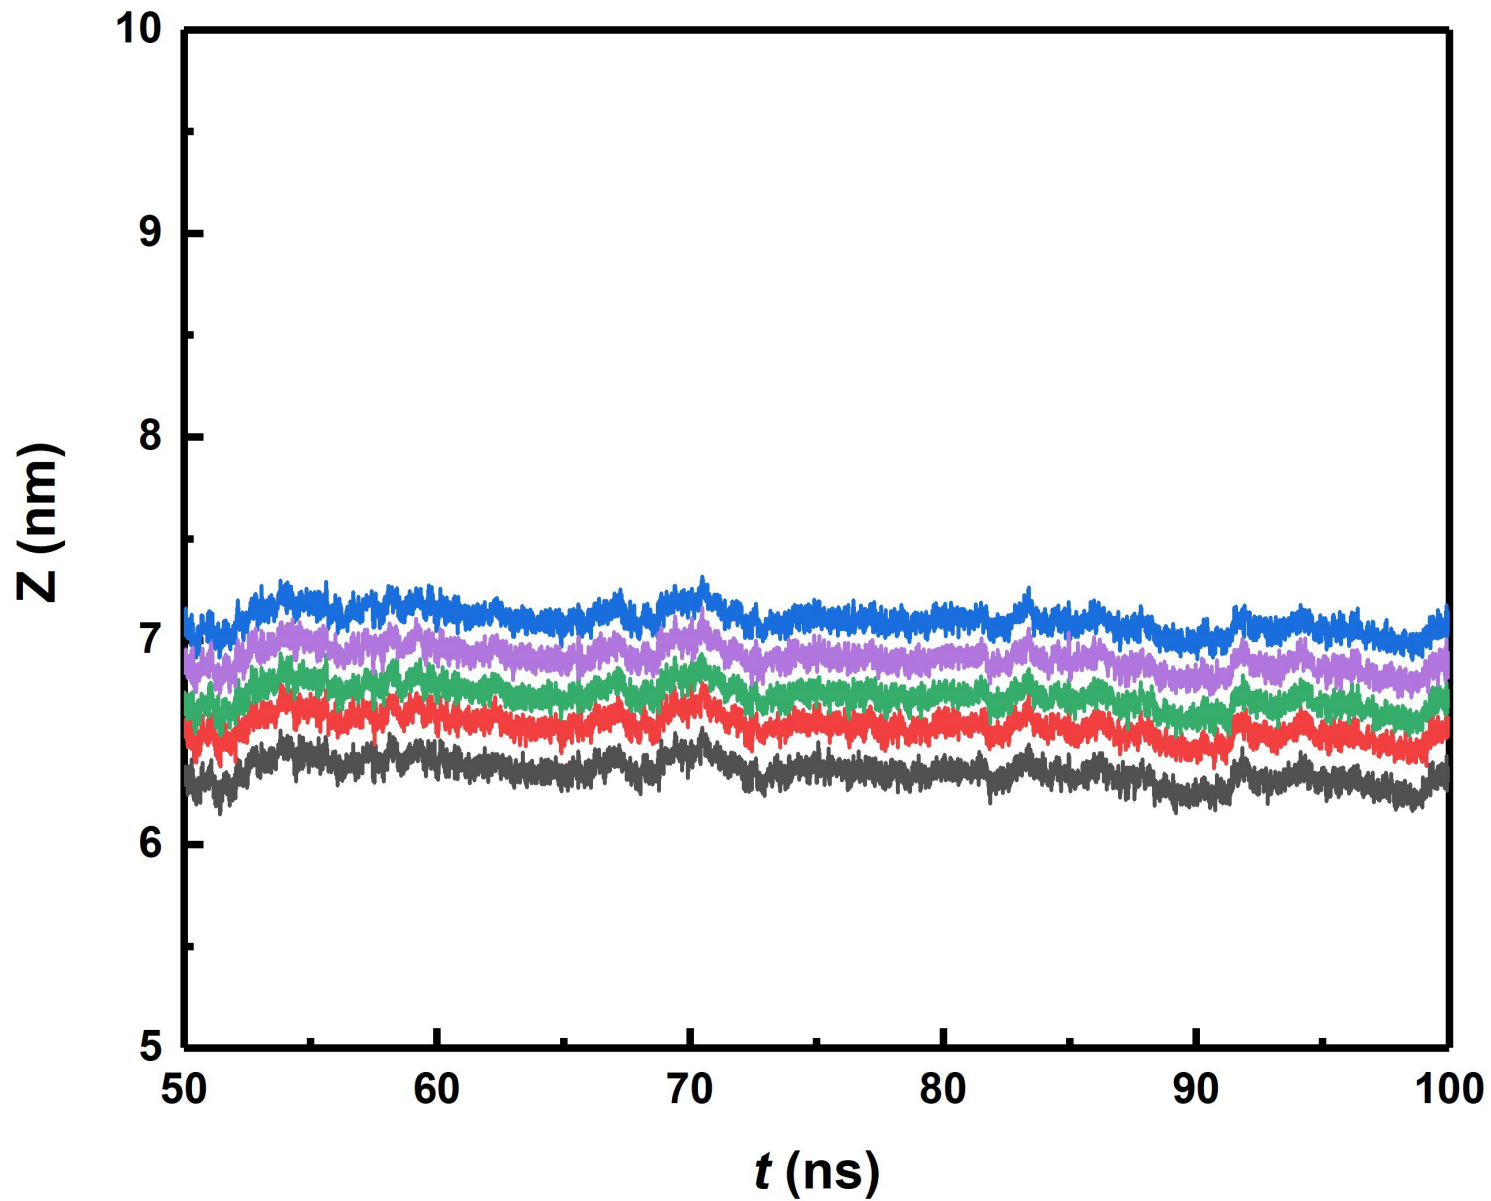

Supplement: d0nr01113d7.pdf [file d0nr01113d7.pdf]

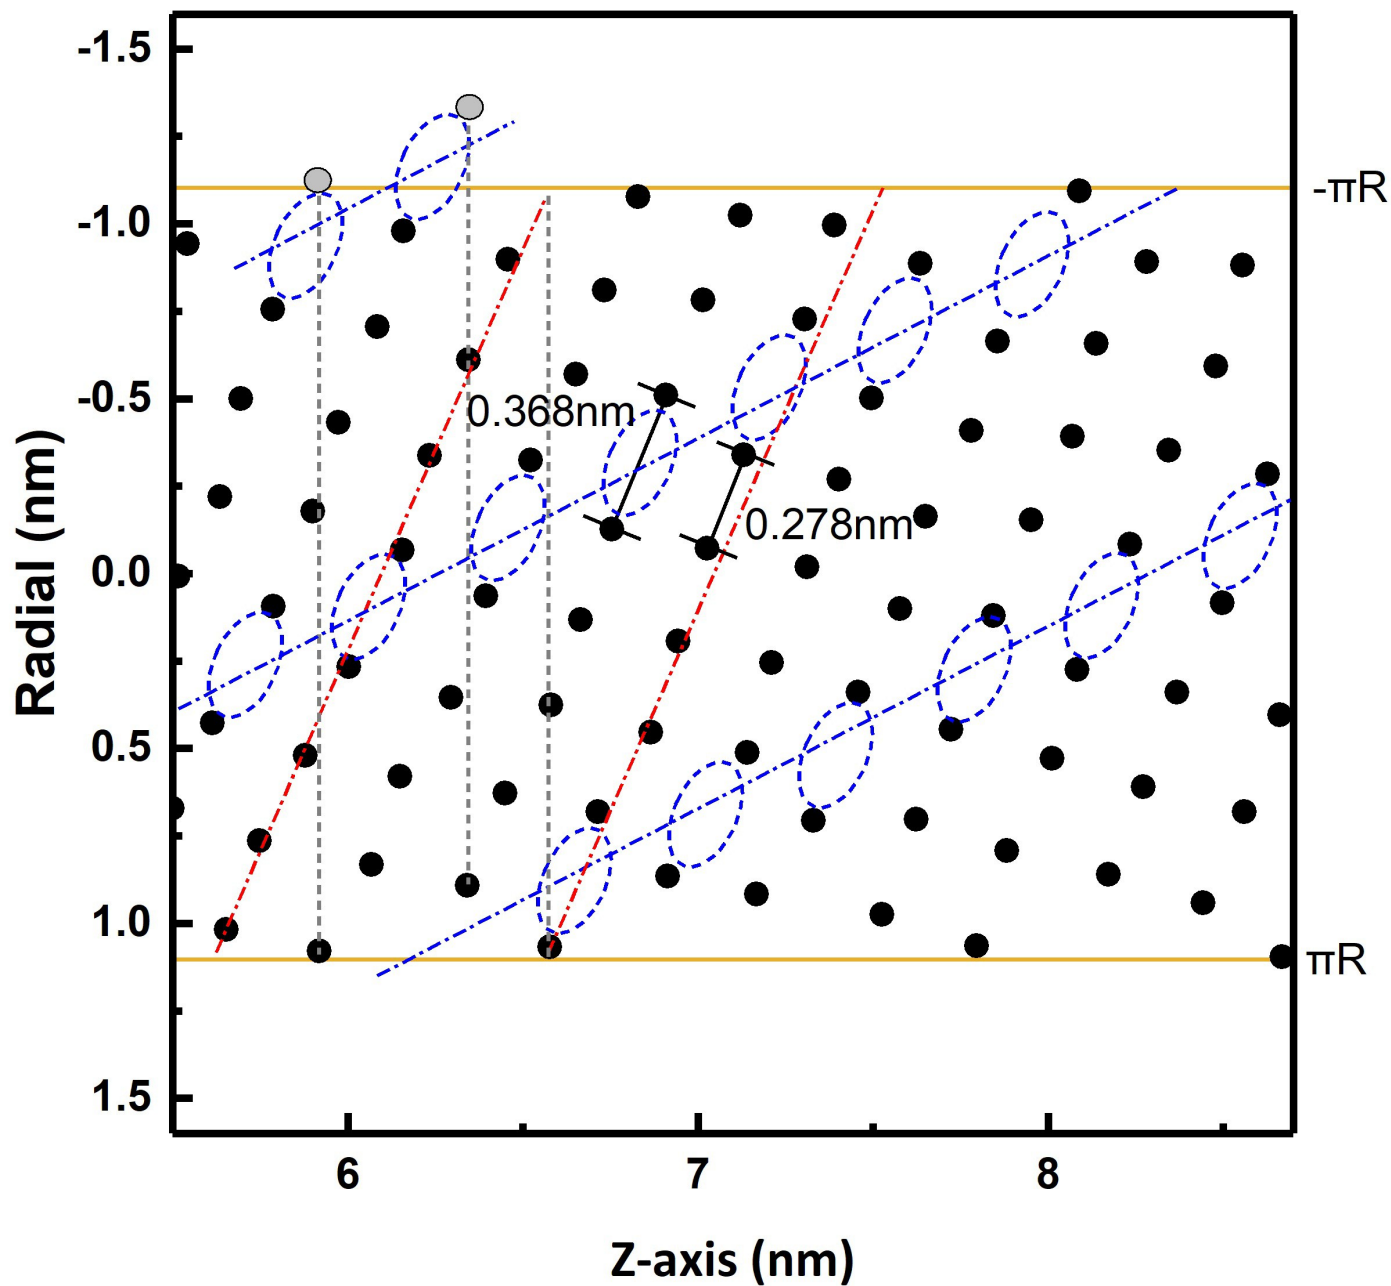

Supplement: d0nr01113d9.pdf [file d0nr01113d9.pdf]
